# Supplementary material for: Two novel pillared-layer lanthanide borates built by Ln@B12O28/29 ring clusters and dicarboxylate linkers (Ln = Pr, Nd)
Source: Royal Society of Chemistry journal article supplement (doi:10.1039/c6dt01909a), 2016-01-01
Supplement: c6dt01909a1.pdf [file c6dt01909a1.pdf]

## Supporting Information

### Two novel pillared-layer lanthanide borates built by Ln@B<sub>12</sub>O<sub>28/29</sub> ring clusters and dicarboxylate linkers (Ln = Pr, Nd)

Lei-Lei Li,<sup>a</sup> Rui Pan,<sup>a</sup> Jun-Wei Zhao,<sup>c</sup> Bai-Feng Yang,<sup>a</sup> and Guo-Yu Yang<sup>\*,a,b</sup>

<sup>a</sup>MOE Key Laboratory of Cluster Science, School of Chemistry, Beijing Institute of Technology, Beijing 100081, China. E-mail: ygy@bit.edu.cn

<sup>b</sup>Department of Chemistry, Key Laboratory for preparation and Application of Ordered Structural Materials of Guangdong Province, Shantou University, Shantou, Guangdong 515063, China.

<sup>c</sup>Henan Key Laboratory of Polyoxometalate Chemistry, College of Chemistry and Chemical Engineering, Henan University, Kaifeng, Henan 475004 (China).

#### Experimental Section

**Materials and Methods.** All chemicals were purchased commercially and used without further purification. Powder X-ray diffraction (PXRD) data were collected on a Bruker D8 Advance diffractometer with Cu K $\alpha$  radiation ( $\lambda = 1.5406 \text{ \AA}$ ). C, H and N elemental analyses were performed on a Euro EA 3000 CHNS/O analyzer. IR spectra were obtained on a Smart Omin-Transmission spectro- photometer with KBr pellets in the range of 4000–500 cm<sup>-1</sup>. Thermogravimetric (TG) analyses were carried out on a Mettler TGA/SDTA 851 thermal analyzer in the temperature range of 30–1000 °C in air atmosphere with a heating rate of 10 °C min<sup>-1</sup>. The diffuse-reflectance spectra were recorded at room temperature on a computer-controlled PE Lambda 900 UV-vis spectrometer equipped with an integrating sphere in the wavelength range of 200–800 nm. Luminescence measurements were performed in the solid state at room temperature with an Edinburgh FLS920 fluorescence spectrometer.

**Synthesis of 1-2.** A mixture of Pr<sub>6</sub>O<sub>11</sub> (0.085 g, 0.083 mmol) for **1** and Nd<sub>2</sub>O<sub>3</sub> (0.084 g, 0.25 mmol) for **2**, H<sub>3</sub>BO<sub>3</sub> (0.618 g, 10 mmol), 1,4-benzene dicarboxylic acid (0.041 g, 0.25 mmol), LiNO<sub>3</sub> (0.017 g, 0.25 mmol) and H<sub>2</sub>O (0.50 g, 27.80 mmol) was sealed in a 25 mL Teflon-lined bomb at 220 °C for 7 days and cooled to room temperature. Green for **1** and pink for **2** prismatic crystals were isolated by filtration, washed with distilled water, and dried in air. Yield: *ca.* 55% for **1** and 47% for **2**. Elemental analyses (%) calcd. for **1**: C 7.94, H 1.48. Found: C 7.90, H 1.45. calcd. for **2**: C 7.90, H 1.47. Found: C 7.87, H 1.45.

**Table S1.** Crystal and structure refinement data for **1** and **2**.

|                                                                                                   | <b>1</b>                                                                       | <b>2</b>                                                                       |
|---------------------------------------------------------------------------------------------------|--------------------------------------------------------------------------------|--------------------------------------------------------------------------------|
| formula                                                                                           | C <sub>24</sub> H <sub>16</sub> B <sub>8</sub> O <sub>26</sub> Pr <sub>2</sub> | C <sub>24</sub> H <sub>16</sub> B <sub>8</sub> O <sub>26</sub> Nd <sub>2</sub> |
| fw                                                                                                | 1088.67                                                                        | 1095.33                                                                        |
| crystal system                                                                                    | monoclinic                                                                     | monoclinic                                                                     |
| space group                                                                                       | <i>P</i> 2 <sub>1</sub> / <i>c</i>                                             | <i>P</i> 2 <sub>1</sub> / <i>c</i>                                             |
| <i>a</i> , Å                                                                                      | 12.7199(5)                                                                     | 12.6812(6)                                                                     |
| <i>b</i> , Å                                                                                      | 22.5919(6)                                                                     | 22.5579(7)                                                                     |
| <i>c</i> , Å                                                                                      | 12.8072(5)                                                                     | 12.7742(5)                                                                     |
| $\alpha$ , deg                                                                                    | 90                                                                             | 90                                                                             |
| $\beta$ , deg                                                                                     | 119.035(5)                                                                     | 119.103(6)                                                                     |
| $\gamma$ , deg                                                                                    | 90                                                                             | 90                                                                             |
| <i>V</i> , Å <sup>3</sup>                                                                         | 3217.81(19)                                                                    | 3192.8(2)                                                                      |
| <i>Z</i>                                                                                          | 4                                                                              | 4                                                                              |
| <i>D<sub>c</sub></i> , g cm <sup>-3</sup>                                                         | 2.247                                                                          | 2.279                                                                          |
| <i>T</i> , K                                                                                      | 293(2)                                                                         | 293(2)                                                                         |
| <i>F</i> (000)                                                                                    | 2104                                                                           | 2112                                                                           |
| $\mu$ , mm <sup>-1</sup>                                                                          | 3.106                                                                          | 3.330                                                                          |
| Reflections collected/unique                                                                      | 33816/5652                                                                     | 15803/5617                                                                     |
| <i>R</i> <sub>int</sub>                                                                           | 0.0352                                                                         | 0.0323                                                                         |
| <i>GOF</i> on <i>F</i> <sup>2</sup>                                                               | 1.048                                                                          | 1.003                                                                          |
| <i>R</i> <sub>1</sub> , <i>wR</i> <sub>2</sub> ( <i>I</i> > 2 $\sigma$ ( <i>I</i> )) <sup>a</sup> | 0.0298, 0.1099                                                                 | 0.0257, 0.0651                                                                 |
| <i>R</i> <sub>1</sub> , <i>wR</i> <sub>2</sub> (all data)                                         | 0.0336, 0.1132                                                                 | 0.0335, 0.0679                                                                 |

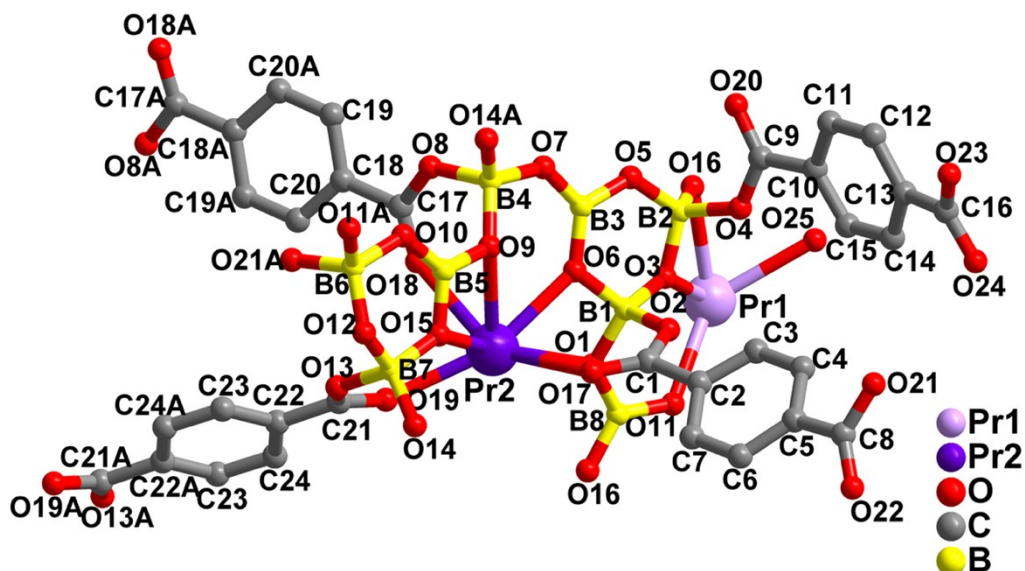**Figure S1.** View of the asymmetric unit of **1**.

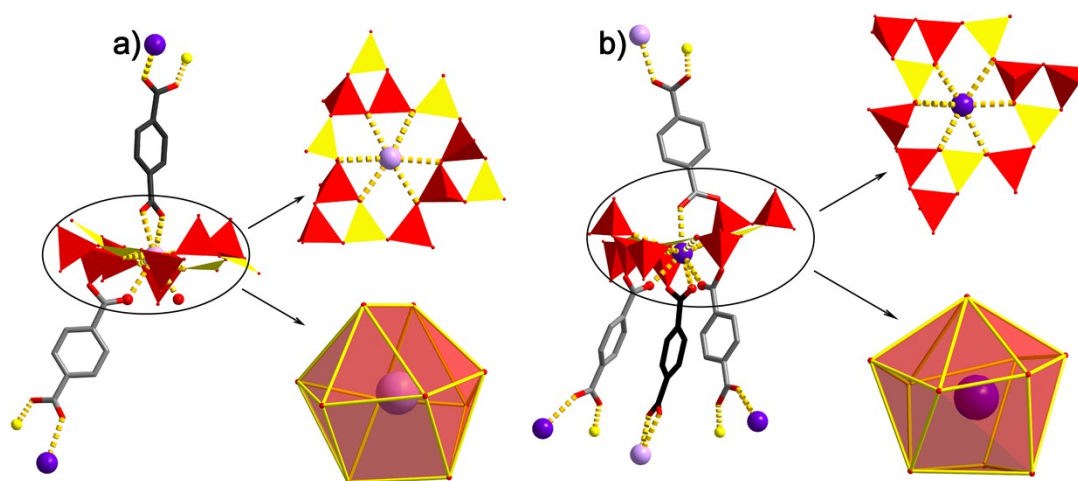

**Figure S2.** (a) View of the coordination environment and geometry of Pr1 in **1**. (b) View of the coordination environment and geometry of Pr2 in **1**. Color code: BO<sub>3</sub> triangle, yellow; BO<sub>4</sub> tetrahedra, red.

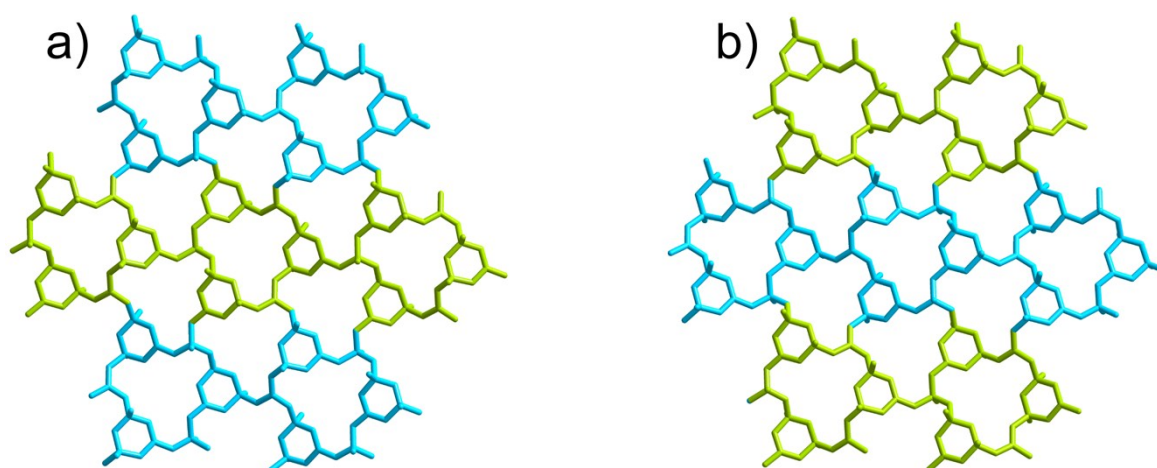

**Figure S3.** (a) Each B<sub>12</sub>O<sub>28</sub> ring cluster links two B<sub>12</sub>O<sub>28</sub> and four B<sub>12</sub>O<sub>29</sub> clusters via oxygen atoms in the same B-O layer. (b) Each B<sub>12</sub>O<sub>29</sub> ring cluster links two B<sub>12</sub>O<sub>29</sub> and four B<sub>12</sub>O<sub>28</sub> clusters via oxygen atoms in the same B-O layer. Color code: B<sub>12</sub>O<sub>28</sub>, yellow green; B<sub>12</sub>O<sub>29</sub>, cyan.

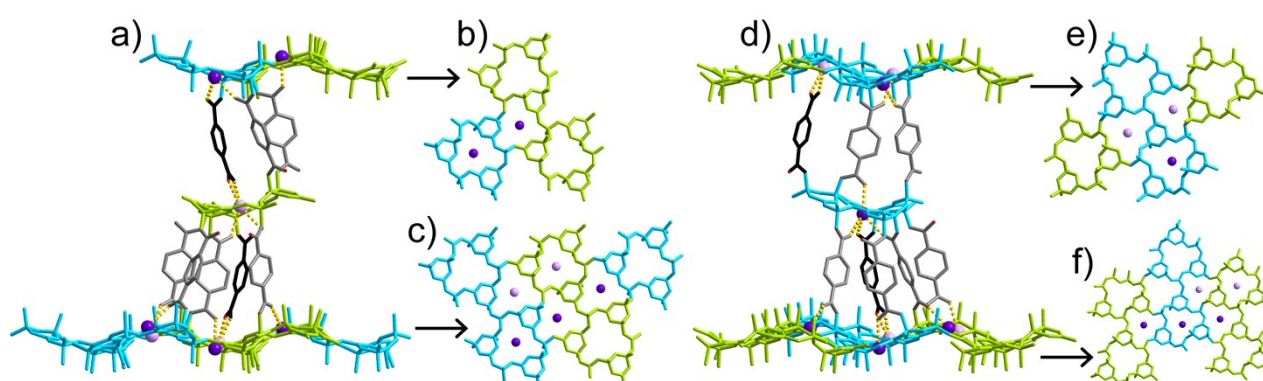

**Figure S4.** (a) Each B<sub>12</sub>O<sub>28</sub> ring cluster links two B<sub>12</sub>O<sub>28</sub>, one B<sub>12</sub>O<sub>29</sub> clusters in the upper B-O layer (b) and two B<sub>12</sub>O<sub>28</sub>, three B<sub>12</sub>O<sub>29</sub> clusters in the lower B-O layer (c) via C-O-B and C-O-Pr linkages. (d) Each B<sub>12</sub>O<sub>29</sub> ring cluster links two B<sub>12</sub>O<sub>28</sub>, two B<sub>12</sub>O<sub>29</sub> clusters in the upper B-O layer (e) and four B<sub>12</sub>O<sub>28</sub>, two B<sub>12</sub>O<sub>29</sub> clusters in the lower B-O layer (f) via C-O-B and C-O-Pr linkages.

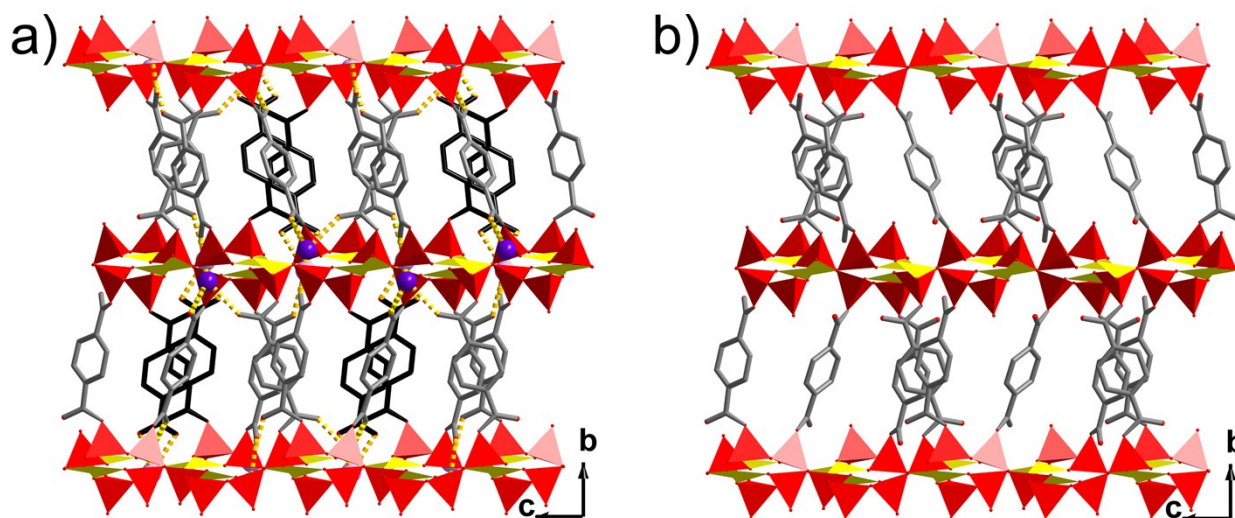

**Figure S5.** (a) View of the 3D pillared-layer framework of **1** linked via C-O-B and C-O-Pr linkages along the [100] direction. (b) View of the 3D pillared-layer framework of **1** linked via C-O-B linkage along the [100] direction.

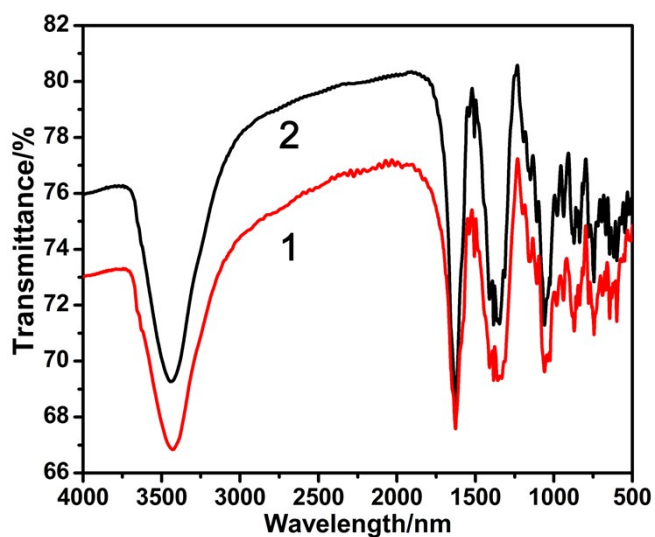

**Figure S6.** The IR spectra of **1-2**.

In order to further verify the existence of bdc and the borate groups in the structures, the infrared spectroscopy was measured (Figure S6). The broad bands in the range of  $3713\text{--}3046\text{ cm}^{-1}$  correspond to the stretching bands of the C–H, and O–H and the sharp peak at  $1628\text{ cm}^{-1}$  is characteristic of  $\text{--CO}_2\text{--}$  stretching vibrational bands, which convincingly shows the existence of bdc. The bands at about  $1425\text{ cm}^{-1}$  are due to the asymmetric stretching of  $\text{BO}_3$  units, while the band at  $1062\text{ cm}^{-1}$  should be associated with  $\text{BO}_4$  units.

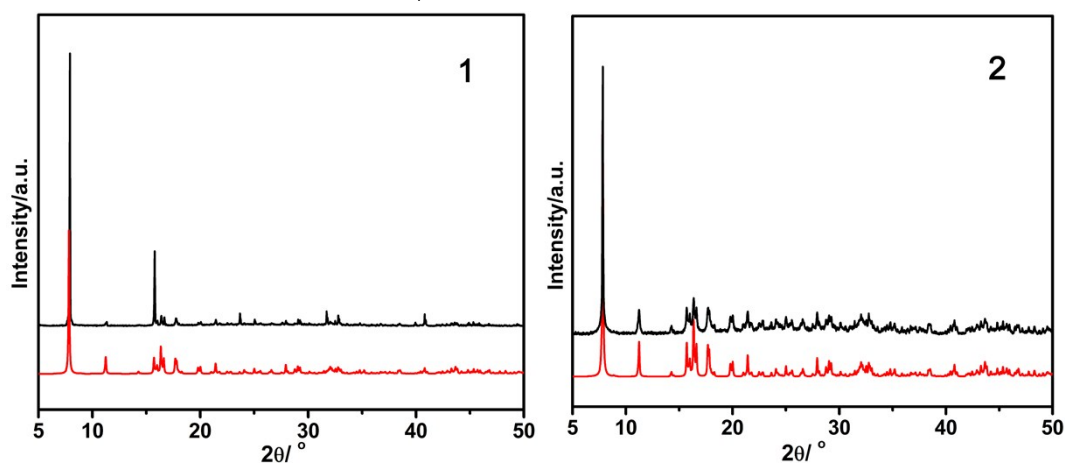

**Figure S7.** Experimental and simulated PXRD patterns for **1** (left) and **2** (right).

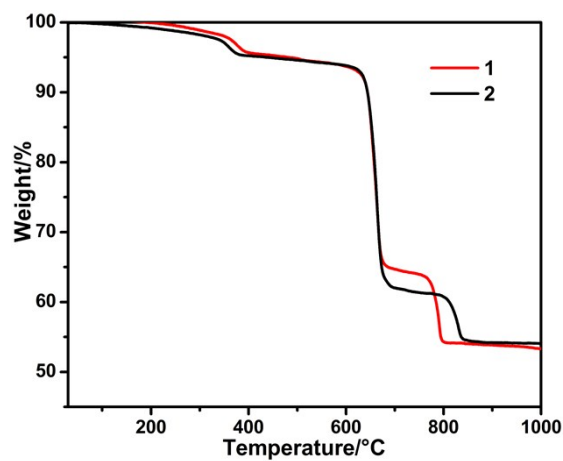

Figure S8. TG curves of 1-2.

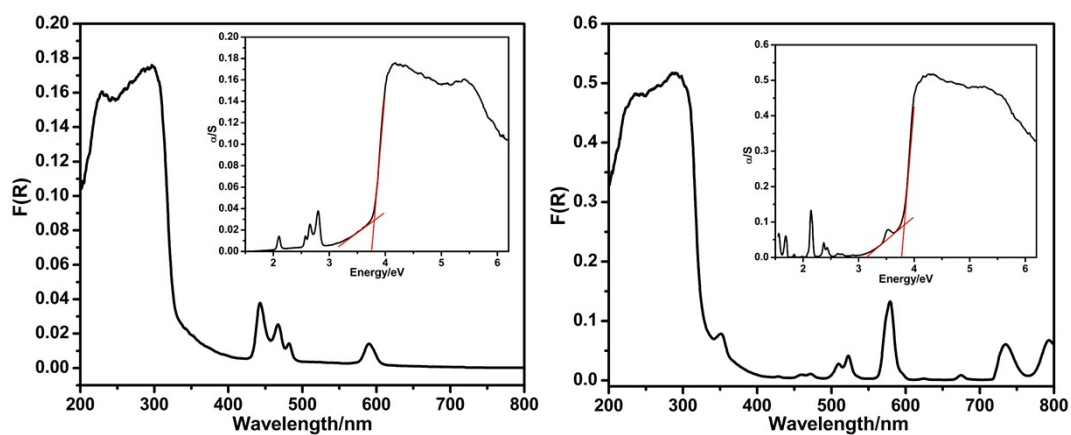

Figure S9. The solid-state UV/Vis spectra of 1 (left) and 2 (right) in the 200-800 nm range at room temperature.
